# Supplementary material for: Monocrystalline VO2 (B) nanobelts: large-scale synthesis, intrinsic peroxidase-like activity and application in biosensing
Source: Royal Society of Chemistry journal article supplement (doi:10.1039/c3ta15051h), 2014-01-01
Supplement: c3ta15051h.pdf [file c3ta15051h.pdf]

Electronic Supplementary Information

**Monocrystalline VO<sub>2</sub> (B) nanobelts: large-scale synthesis, intrinsic  
peroxidase-like activity and application in biosensing**

Guangdi Nie,<sup>a</sup> Liang Zhang,<sup>b</sup> Junyu Lei,<sup>a</sup> Liu Yang,<sup>a</sup> Zhen Zhang,<sup>a</sup> Xiaofeng Lu\*<sup>a</sup> and Ce Wang\*<sup>a</sup>

<sup>a</sup> *Alan G. MacDiarmid Institute, Jilin University, Changchun, 130012, P. R. China. Fax-Tel: +86-431-85168292; E-mail: [xflu@jlu.edu.cn](mailto:xflu@jlu.edu.cn); [cwang@jlu.edu.cn](mailto:cwang@jlu.edu.cn)*

<sup>b</sup> *Department of Polymer Science and Engineering, University of Science and Technology Beijing, Beijing, 100083, P. R. China.*

## Experimental

### Materials

Hydrogen peroxide (H<sub>2</sub>O<sub>2</sub>, 30%, Beijing Chemical Works) and Glucose oxidase (GOx, 100-250 U·mg<sup>-1</sup>, BR, Shanghai Kayon Biological Technology Co. Ltd) were stored in a refrigerator at -20°C. Other chemical reagents including vanadyl acetylacetonate (VO(acac)<sub>2</sub>, 95%), concentrated hydrochloric acid (HCl, AR), 3,3',5,5'-tetramethylbenzidine (TMB, BR), sodium hydroxide (NaOH, AR), acetic acid (HAc, AR), dopamine hydrochloride (DA, 98%), L-ascorbic acid (AA, AR), citric acid (CA, 99+%) and so forth were used as received without any further purification. Ultrapure water was utilized for the preparation of all aqueous solutions.

### Synthesis of catalysts

VO<sub>2</sub> (B) nanobelts were fabricated as follows: a certain amount of VO(acac)<sub>2</sub> (2.5mmol) was dissolved in 30 mL of distilled water containing 0.08 M HCl under magnetic stirring to form a clear and transparent solution, which was then transferred into a 40 mL Teflon-lined autoclave. The reaction proceeded in an electric oven at 160°C for 24 h. After cooling down, the final blue-black product was collected by centrifugation, washed thoroughly with distilled water and ethanol, and ultimately dried at 40°C for characterization and further use.

### Apparatus

The morphology of the sample was observed by a cold field-emission scanning electron microscopy (FESEM, Hitachi SU8020) and a transmission electron microscopy (TEM, JEOL JEM-1200 EX) operated at 3.0 and 100 kV, respectively. High-resolution TEM (HRTEM) images, selected area electron diffraction (SAED) patterns and energy dispersive X-ray (EDX) analysis were conducted on a FEI Tecnai G2 F20) electron microscope at an acceleration voltage of 200 kV. X-Ray diffraction (XRD, PAN-alytical B.V. Empyrean) with CuK $\alpha$  radiation was employed to investigate the crystallographic structure of the as-prepared product. Fourier-transform infrared (FTIR) spectra of KBr powder-pressed pellets were recorded on a Bruker Vector 22 Spectrometer. The chemical composition of the resulting VO<sub>2</sub> (B) nanobelts was characterized by X-ray photoelectron spectroscopy (XPS, Thermo Scientific ESCALAB250). The peroxidase-like catalytic activity was measured by ultra-violet-visible (UV-vis) spectra performed on Shimadzu UV-2501 PC spectrometer.

### Colorimetric assay

In a typical colorimetric experiment, unless otherwise stated, 10  $\mu$ L of catalyst aqueous dispersion (3 mg·mL<sup>-1</sup>) was added to 3 mL of acetate buffer solution (0.1 M, pH = 5.0) consisting of 100  $\mu$ M TMB and 5 mM H<sub>2</sub>O<sub>2</sub>. Afterwards the sample in cuvette was positioned immediately in the cell holder of UV-Vis spectrophotometer for the steady-state kinetic measurements which were implemented in time course mode by monitoring the absorbance changes at 650 nm. The apparent kinetic parameters in the Michaelis-Menten equation were calculated on the basis of Lineweaver-Burk plot:  $1/v = K_m/V_{max} \cdot (1/[S] + 1/K_m)$ , where  $v$ ,  $K_m$ ,  $V_{max}$  and  $[S]$  represent, respectively, the initial velocity, the Michaelis constant, the maximal reaction velocity and the substrate concentration. DA, AA and CA with the same content of 5 mM were used instead of H<sub>2</sub>O<sub>2</sub> for comparison purpose to verify the selectivity of VO<sub>2</sub> (B) nanobelts.

As for the determination of glucose, there is really no essential difference from the mentioned conditions except for that 10  $\mu\text{L}$  of 10  $\text{mg}\cdot\text{mL}^{-1}$  GOx and 100  $\mu\text{L}$  of glucose with different concentrations in 500  $\mu\text{L}$  of phosphate buffer solution (10 mM, pH = 7.0) should be incubated at 37  $^{\circ}\text{C}$  for 30 min before approximately 3 mL of mixed specimen was prepared, and that absorption spectra were tracked at the time of 120 s to survey the oxidation reaction of the substrate TMB.

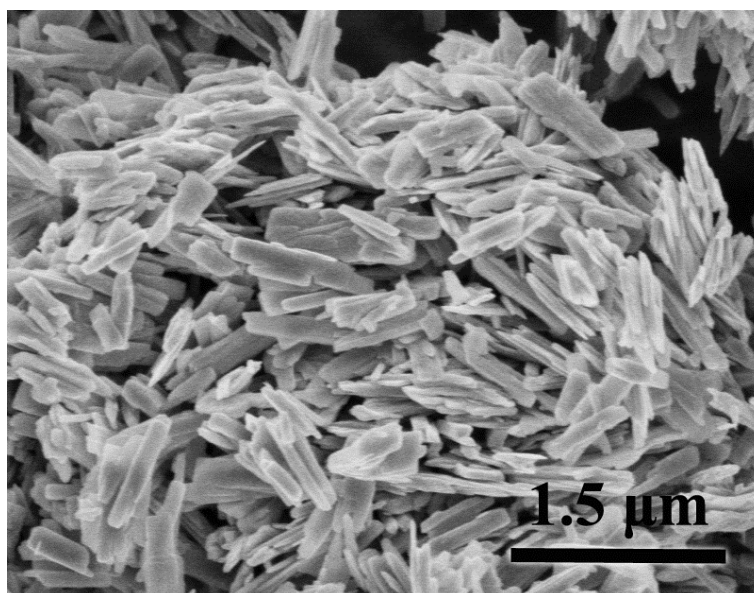

Fig. S1 SEM image of the belt-like  $\text{VO}_2$  (B) nanostructures.

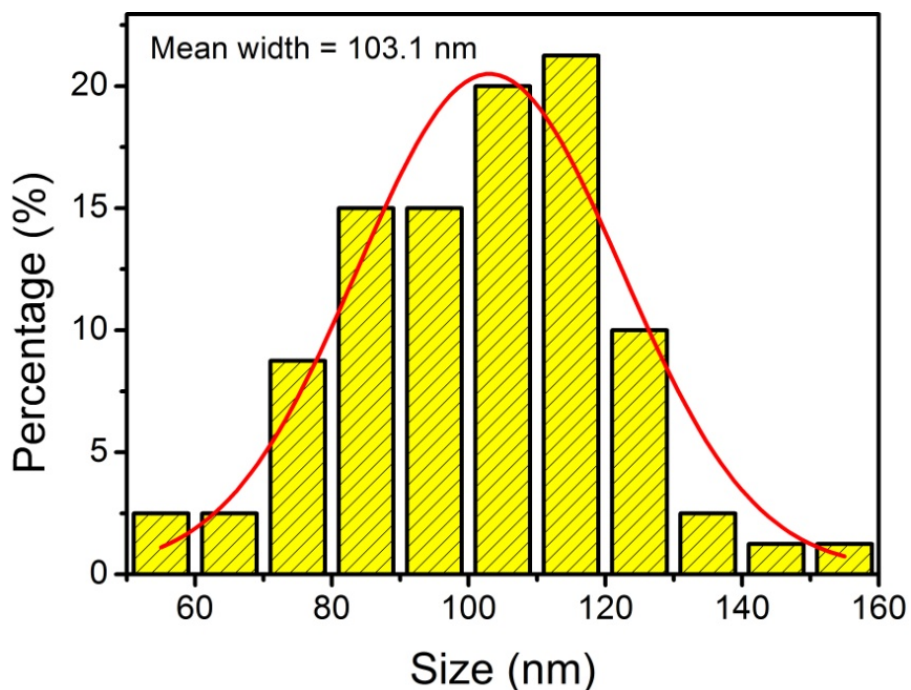

Fig. S2 Width distribution of  $\text{VO}_2$  (B) nanobelts counted from the TEM image.

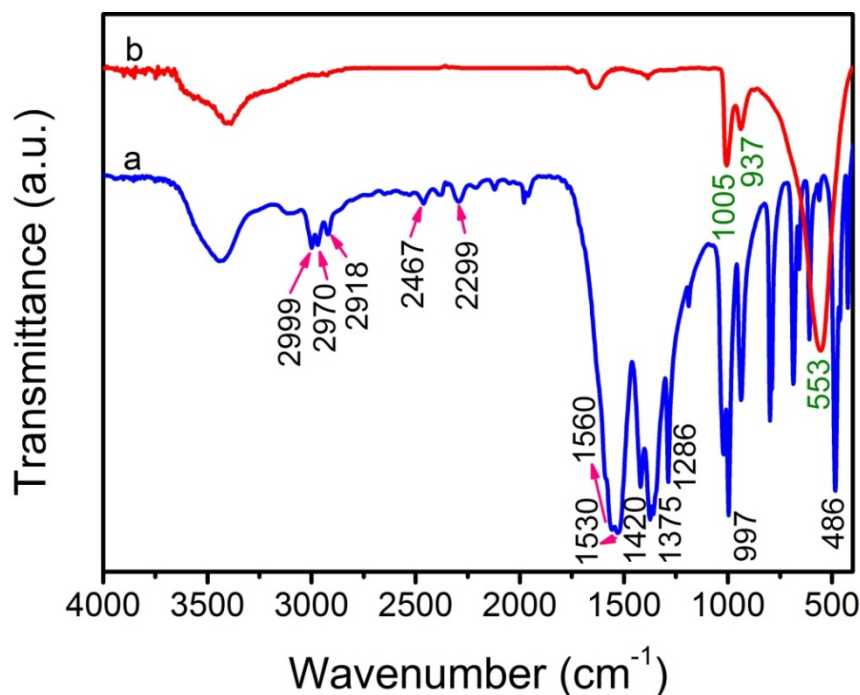

Fig. S3 FTIR spectra of (a) VO(acac)<sub>2</sub> raw materials and (b) VO<sub>2</sub> (B) nanobelts.

As depicted in Fig. S3a, the FTIR spectrum of VO(acac)<sub>2</sub>, which is in perfect agreement with the reference,<sup>1</sup> the weak and overlapping bands in the region of 2900~3000 cm<sup>-1</sup> are aroused by the symmetric and antisymmetric vibrations of CH<sub>3</sub>. The stretching vibrations of -CO-CH-CO- are observed at 2467 and 2299 cm<sup>-1</sup>. The peaks positioned at 1560, 1530 and 1375 are ascribed to C=O vibration modes. The stretching vibrations of C-O and C=C appear separately at 1420 and 1286 cm<sup>-1</sup>. Moreover, the characteristic peaks at 997 and 486 cm<sup>-1</sup> indicate the existence of V=O and V-O bonds. With regard to the as-prepared VO<sub>2</sub> (B) nanobelts, by contrast, no peaks belong to VO(acac)<sub>2</sub> are discovered in Fig. S3b, suggesting the complete hydrolysis of the precursor. In the light of the earlier report,<sup>2</sup> the bands at 553, 937 and 1005 cm<sup>-1</sup> can be identified to be intrinsic for VO<sub>2</sub> (B), which are attributed to the V-O-V octahedral bending deformation modes, the coupled vibration of V=O and V-O-V as well as the stretching of short V=O, respectively.

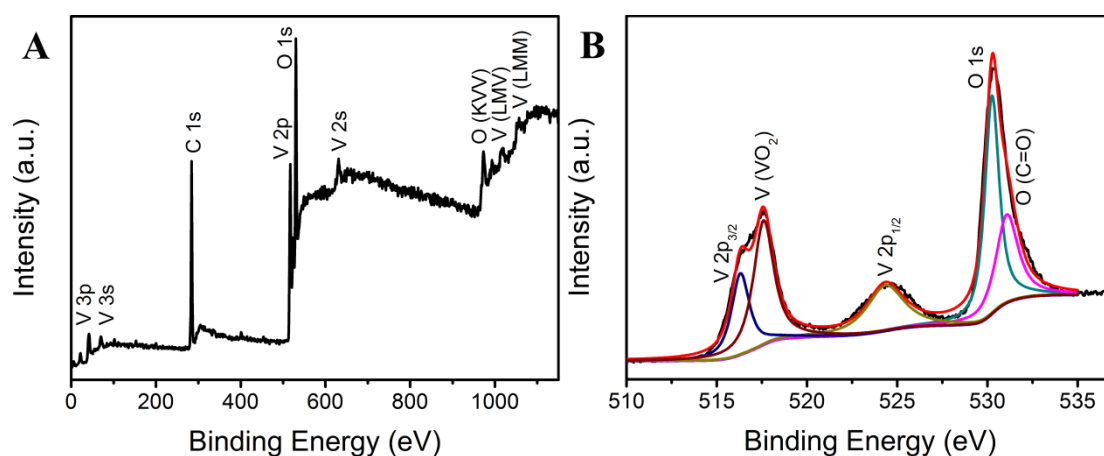

Fig. S4 XPS spectra of VO<sub>2</sub> (B) nanobelts: (A) full survey spectrum, (B) V 2p and O 1s regions.

In order to study the surface electronic state and chemical composition of the final products, their XPS spectra were given in Fig. S4. The wide-scan XPS spectrum (Fig. S4A) distinctly reveals the presence of V, C and O elements, among which the signal of C should primarily be imputed to the absorbed carbon dioxide. To deeply evaluate the binding property of the elements in VO<sub>2</sub> (B), high-resolution XPS spectrum (Fig. S4B) can be fitted with three main peaks centered at 516.3, 517.6 and 524.3 eV for V 2p region, which are associated severally with V 2p<sub>3/2</sub>, VO<sub>2</sub> and V 2p<sub>1/2</sub>,<sup>3,4</sup> expounding that V (IV) as the exclusive valence state exists in the final nanobelts, and another predominant peak accompanied by carbonyl (C=O) line for O 1s region.

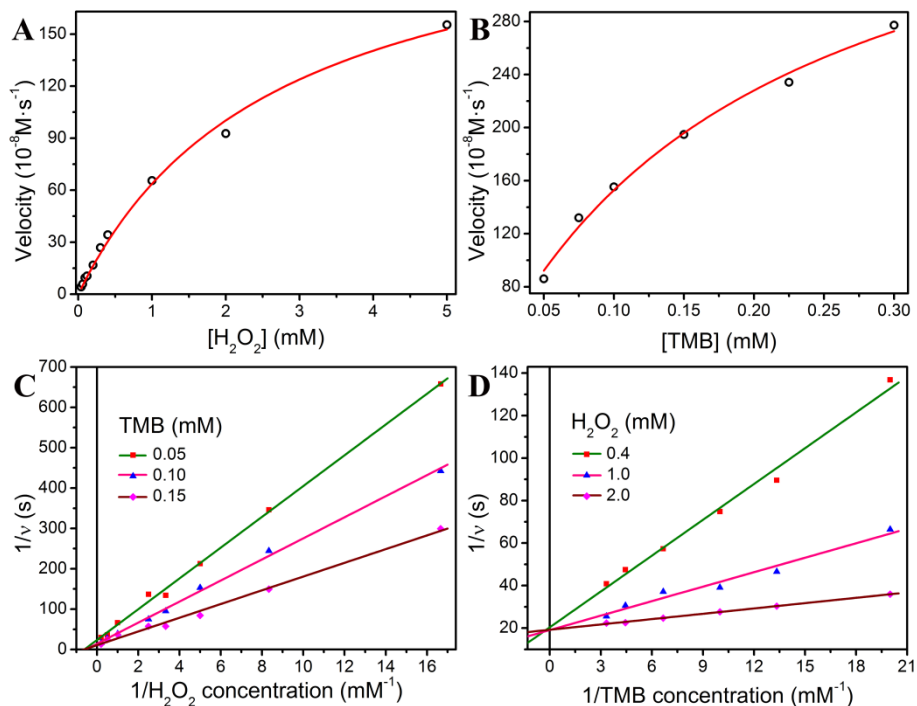

Fig. S5 Steady-state kinetic assay of VO<sub>2</sub> (B) nanobelts. The catalyst concentration was fixed at 10  $\mu\text{g}\cdot\text{mL}^{-1}$  in 3 mL of acetate buffer solution (0.1 M, pH = 5.0). (A) TMB concentration was kept constant at 100  $\mu\text{M}$  and the H<sub>2</sub>O<sub>2</sub> concentration was varied. (B) H<sub>2</sub>O<sub>2</sub> concentration was maintained at 5 mM and the TMB concentration was varied. Double reciprocal plots of VO<sub>2</sub> (B) catalytic activity for the two substrates (C) H<sub>2</sub>O<sub>2</sub> and (D) TMB. Details were described in the Experimental section.

Table S1 Comparison of the kinetic parameters between different nanomaterials and horseradish peroxidase (HRP) with (A) H<sub>2</sub>O<sub>2</sub> and (B) TMB as the substrates.

| A                                       | Catalyst                                              | K <sub>m</sub> [mM] | V <sub>max</sub> [10 <sup>-8</sup> M·s <sup>-1</sup> ] |
|-----------------------------------------|-------------------------------------------------------|---------------------|--------------------------------------------------------|
| Substrate H <sub>2</sub> O <sub>2</sub> | HRP <sup>5</sup>                                      | 3.7                 | 8.71                                                   |
|                                         | Fe <sub>3</sub> O <sub>4</sub> MNPs <sup>5</sup>      | 154                 | 9.78                                                   |
|                                         | ZnFe <sub>2</sub> O <sub>4</sub> MNPs <sup>6</sup>    | 1.66                | 7.74                                                   |
|                                         | Co <sub>3</sub> O <sub>4</sub> GNs <sup>7</sup>       | 245                 | 28.5                                                   |
|                                         | PB/γ-Fe <sub>2</sub> O <sub>3</sub> MNPs <sup>8</sup> | 323.6               | 117                                                    |
|                                         | VO <sub>2</sub> (B)                                   | 1.69                | 177                                                    |

  

| B             | Catalyst                                              | K <sub>m</sub> [mM] | V <sub>max</sub> [10 <sup>-8</sup> M·s <sup>-1</sup> ] |
|---------------|-------------------------------------------------------|---------------------|--------------------------------------------------------|
| Substrate TMB | HRP <sup>5</sup>                                      | 0.434               | 10.0                                                   |
|               | Fe <sub>3</sub> O <sub>4</sub> MNPs <sup>5</sup>      | 0.098               | 3.44                                                   |
|               | ZnFe <sub>2</sub> O <sub>4</sub> MNPs <sup>6</sup>    | 0.85                | 13.31                                                  |
|               | Co <sub>3</sub> O <sub>4</sub> GNs <sup>7</sup>       | 0.12                | 33.2                                                   |
|               | PB/γ-Fe <sub>2</sub> O <sub>3</sub> MNPs <sup>8</sup> | 0.307               | 106                                                    |
|               | VO <sub>2</sub> (B)                                   | 0.146               | 131                                                    |

Table S2 Reproducibility between two batches of VO<sub>2</sub> (B) nanobelts prepared at different times using the same method.

| Batch No.              | 1                    | 2                     | RSD (%) |
|------------------------|----------------------|-----------------------|---------|
| Catalytic activity (%) | 100±5.5 <sup>a</sup> | 94.5±5.0 <sup>a</sup> | 5.9     |

<sup>a</sup> RSD for nine repeated measurements.

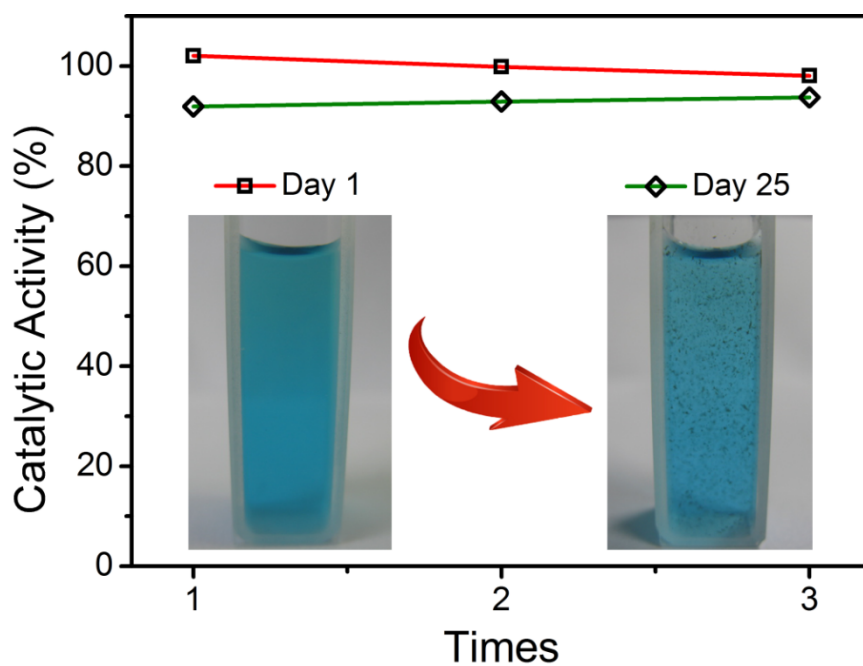

Fig. S6 Long-term stability of VO<sub>2</sub> (B) stock solution with three duplicate determinations. Inset:

the corresponding pictures of colored products.

## References

- 1 L. J. Mao, C. Y. Liu and J. Li, *J. Mater. Chem.*, 2008, **18**, 1640-1643.
- 2 S. R. Popuri, M. Miclau, A. Artemenko, C. Labrugere, A. Villesuzanne and M. Pollet, *Inorg. Chem.*, 2013, **52**, 4780-4785.
- 3 Y. Xu, L. Zheng and Y. Xie, *Dalton Trans.*, 2010, **39**, 10729-10738.
- 4 X. Y. Chen, X. Wang, Z. H. Wang, J. X. Wan, J. W. Liu and Y. T. Qian, *Nanotechnology*, 2004, **15**, 1685-1687.
- 5 L. Z. Gao, J. Zhuang, L. Nie, J. B. Zhang, Y. Zhang, N. Gu, T. H. Wang, J. Feng, D. L. Yang, S. Perrett and X. Y. Yan, *Nat. Nanotechnol.*, 2007, **2**, 577-583.
- 6 L. Su, J. Feng, X. M. Zhou, C. L. Ren, H. H. Li and X. G. Chen, *Anal. Chem.*, 2012, **84**, 5753-5758.
- 7 J. F. Yin, H. Q. Cao and Y. X. Lu, *J. Mater. Chem.*, 2012, **22**, 527-534.
- 8 X. Q. Zhang, S. W. Gong, Y. Zhang, T. Yang, C. Y. Wang and N. Gu, *J. Mater. Chem.*, 2010, **20**, 5110-5116.
- 9 W. W. He, Y. Liu, J. S. Yuan, J. J. Yin, X. C. Wu, X. N. Hu, K. Zhang, J. B. Liu, C. Y. Chen, Y. L. Ji and Y. T. Guo, *Biomaterials*, 2011, **32**, 1139-1147.
